1 **Differential neutralization and inhibition of SARS-CoV-2 variants by antibodies elicited by**  
2 **COVID-19 mRNA vaccines**

3  
4 **Authors:**

5 Li Wang<sup>1\*</sup>, Markus H. Kainulainen<sup>1\*</sup>, Nannan Jiang<sup>1\*</sup>, Han Di<sup>1\*</sup>, Gaston Bonenfant<sup>1\*</sup>, Lisa Mills<sup>1</sup>,  
6 Michael Currier<sup>1</sup>, Punya Shrivastava-Ranjan<sup>1</sup>, Brenda M. Calderon<sup>1</sup>, Mili Sheth<sup>1</sup>, Brian R. Mann<sup>1</sup>,  
7 Jaber Hossain<sup>1</sup>, Xudong Lin<sup>1</sup>, Sandra Lester<sup>1</sup>, Elizabeth Pusch<sup>1</sup>, Joyce Jones<sup>1</sup>, Dan Cui<sup>1</sup>, Payel  
8 Chatterjee<sup>1</sup>, Harley M. Jenks<sup>1</sup>, Esther Morantz<sup>1</sup>, Gloria Larson<sup>1</sup>, Masato Hatta<sup>1</sup>, Jennifer  
9 Harcourt<sup>1</sup>, Azaibi Tamin<sup>1</sup>, Yan Li<sup>1</sup>, Ying Tao<sup>1</sup>, Kun Zhao<sup>1</sup>, Kristine Lacek<sup>1</sup>, Ashely Burroughs<sup>1</sup>,  
10 Terianne Wong<sup>1</sup>, Suxiang Tong<sup>1</sup>, John R. Barnes<sup>1</sup>, Mark W. Tenforde<sup>1</sup>, Wesley H. Self<sup>2</sup>, Nathan  
11 I. Shapiro<sup>3</sup>, Matthew C. Exline<sup>4</sup>, D. Clark Files<sup>5</sup>, Kevin W. Gibbs<sup>5</sup>, David N. Hager<sup>6</sup>, Manish Patel<sup>1</sup>,  
12 Alison S. Laufer Halpin<sup>1</sup>, Laura K. McMullan<sup>1</sup>, Justin S. Lee<sup>1</sup>, Christina F. Spiropoulou<sup>1</sup>, Natalie J.  
13 Thornburg<sup>1</sup>, M. Steven Oberste<sup>1</sup>, Vivien Dugan<sup>1</sup>, SSEV Bioinformatics Working Group, David E.  
14 Wentworth<sup>1</sup>, Bin Zhou<sup>1</sup>

15  
16 **Affiliations:**

17 <sup>1</sup>COVID-19 Emergency Response, Centers for Disease Control and Prevention, Atlanta, Georgia,  
18 USA

19 <sup>2</sup>Vanderbilt University, Nashville, Tennessee, USA

20 <sup>3</sup>Harvard University, Cambridge, Massachusetts, USA

21 <sup>4</sup>Ohio State University, Columbus, Ohio, USA

22 <sup>5</sup>Wake Forest Baptist Medical Center, Winston-Salem, North Carolina, USA

23 <sup>6</sup>Johns Hopkins University, Baltimore, Maryland, USA

24  
25 \* These authors contributed equally to this study

26  
27 Correspondence: [bzhou@cdc.gov](mailto:bzhou@cdc.gov); [dwentworth@cdc.gov](mailto:dwentworth@cdc.gov)

28  
29 SSEV Bioinformatics Working Group: Dhvani Batra, Andrew Beck, Jason Caravas, Roxana  
30 Cintron-Moret, Peter W. Cook, Jonathan Gerhart, Christopher Gulvik, Norman Hassell, Dakota  
31 Howard, Kristen Knipe, Rebecca J. Kondor, Nicholas Kovacs, Kristine Lacek, Brian R. Mann,  
32 Laura K. McMullan, Kara Moser, Clinton R. Paden, Benjamin Rambo Martin, Matthew Schmerer,  
33 Samuel Shepard, Richard Stanton, Thomas Stark, Erisa Sula, Kendall Tymeckia, Yvette  
34 Unoarumhi

35 **Abstract:**

36 The divergence of SARS-CoV-2 into variants of concern/interest (VOC/VOI) necessitated  
37 analysis of their impact on vaccines. Escape from vaccine-induced antibodies by SARS-CoV-2  
38 VOC/VOIs was analyzed to ascertain and rank their risk. The variants showed differential  
39 reductions in neutralization and replication titers by the post-vaccination sera with Beta variant  
40 showing the most neutralization escape that was mechanistically driven by mutations in both the  
41 N-terminal domain and receptor-binding domain of the spike.

42 **Main Text:**

43 The evolution of severe acute respiratory syndrome coronavirus 2 (SARS-CoV-2) has resulted in  
44 the emergence of many new variants that may have exacerbated the COVID-19 pandemic.  
45 SARS-CoV-2 was first detected in China in December 2019; within six months a variant with a  
46 D614G substitution in the viral spike protein became the predominant circulating strain globally.  
47 While the D614G variant did not evade antibody-mediated neutralization, enhanced replication  
48 and transmissibility of the variant were confirmed in multiple animal models by different groups<sup>1-  
49 3</sup>. Enhanced transmissibility and a larger infected population likely led to diversification of the  
50 D614G variant into many new lineages. In December 2020, the United Kingdom reported  
51 increased transmission of a novel variant of concern (VOC) 202012/01<sup>4</sup>, also referred to as the  
52 Alpha (or B.1.1.7, Pango nomenclature) variant<sup>5</sup>. The Alpha variant rapidly disseminated and  
53 became the predominant circulating strain in many countries, including the United States (US)<sup>6,7</sup>  
54 (**Figure 1**). Meanwhile, the Beta (i.e., B.1.351) and Gamma (i.e., P.1) variants were first detected  
55 in South Africa in May 2020 and in Brazil in November 2020, respectively, where each variant  
56 became the predominant lineage in its respective geographic region<sup>8-10</sup>. As of October 2021, the  
57 Delta variant (B.1.617.2), which was first identified in India<sup>11</sup>, had displaced the Alpha variant and  
58 become the predominant variant within the US (**Figure 1**) and globally. The World Health  
59 Organization (WHO) and national health authorities, such as the US government SARS-CoV-2  
60 Interagency Group (US-SIG), have designated selected SARS-CoV-2 variants as VOCs or  
61 variants of interest (VOIs) (**Supplementary Table S1**) based on genomic analysis,  
62 transmissibility, disease severity, and, most importantly, impact on the performance of  
63 therapeutics or vaccines. Continuous monitoring and rapid characterization of VOCs, VOIs, and  
64 other new variants are critical to alleviating the devastating impact of the current pandemic.

65  
66 As mRNA vaccines were the earliest and primary form of COVID-19 vaccines administered in the  
67 US, we systematically evaluated the neutralization efficiency of U.S. mRNA vaccinee sera against  
68 all VOCs and VOIs designated by the WHO Virus Evolution Working Group or US-SIG. To  
69 characterize emerging variants in the shortest time frame, particularly in periods which lacked  
70 clinical isolates in the US, we generated SARS-CoV-2 fluorescent reporter viruses with VOC and  
71 VOI spike substitutions/deletions in the progenitor Wuhan-Hu-1 virus (designated as 614D in this  
72 study) by reverse genetics (**Supplementary Table S1**). The reporter SARS-CoV-2 viruses were  
73 designed to behave similarly to their clinical isolate counterparts in neutralization assays due to  
74 an identical variant spike protein, which is the sole antigen of all vaccines authorized in the US.  
75 The spike glycoproteins of many VOI/VOC lineages have subtle differences within the lineages,

76 and the sequence of spike protein used in our studies represent the consensus for the variant  
77 lineage or represent a more divergent one from the progenitor within that lineage  
78 (**Supplementary Table S1**). For example, the spike of Beta variant tested includes R246I in the  
79 N-terminal domain (NTD), which is not found in all Beta lineage viruses.

80  
81 Using a focus reduction neutralization test (FRNT), we detected minimal impact of the D614G  
82 substitution (designated as virus 614G) on the neutralizing activity of the vaccinee sera, compared  
83 to the progenitor 614D reference virus, of which the spike sequence is most closely related to  
84 what was used in vaccine development (**Figure 2a**). The Alpha variant (B.1.1.7) showed slightly  
85 decreased neutralizing antibody titers while the Gamma (P.1), Delta (B.1.617.2), Epsilon  
86 (B.1.427/B.1.429), Zeta (P.2), Eta (B.1.525), Iota (B.1.526/B.1.526.1), Lambda (C.37), and  
87 B.1.617.3 variants showed greater titer reductions but were <4-fold compared to the 614D virus.  
88 The Beta (B.1.351), Theta (P.3), Kappa (B.1.617.1), and Mu (B.1.621) variants showed  $\geq$ 4-fold  
89 reductions in titers, with the Beta and Mu variants showing the greatest escape from neutralization  
90 with 6.1-fold and 5.1-fold reductions, respectively (**Figure 2a**).

91  
92 As the prevalence of variants rose within the US (**Figure 1**), the Centers for Disease Control and  
93 Prevention (CDC) received an increased number of clinical specimens from state public health  
94 laboratories and other CDC collaborating laboratories through the National SARS-CoV-2 Strain  
95 Surveillance (NS3) system ([https://www.cdc.gov/coronavirus/2019-ncov/variants/cdc-role-](https://www.cdc.gov/coronavirus/2019-ncov/variants/cdc-role-surveillance.html)  
96 [surveillance.html](https://www.cdc.gov/coronavirus/2019-ncov/variants/cdc-role-surveillance.html)). We isolated representative variants from these clinical specimens for  
97 characterization by FRNT, and sequenced the stocks to ensure the spike correctly represented  
98 the appropriate variant lineage. Although the reductions in neutralization differed slightly, they  
99 were generally consistent between the reporter viruses and clinical isolates. The Beta isolate was  
100 the most resistant to neutralization, followed by Mu, Kappa and B.1.617.3. The Gamma and Delta  
101 variants showed modest escape from neutralization, and the Alpha variant neutralization was not  
102 significantly reduced as compared to the 614D reference virus (**Figure 2b**). Lambda was the only  
103 variant that showed a difference between the reporter virus and the clinical isolate, which had an  
104 approximate 3-fold reduction versus 1-to-1.2-fold reduction in neutralizing titers, respectively  
105 (**Figure 2a and 2b**). The Lambda variant has at least 14 substitutions/deletions in the spike  
106 (**Supplementary Table S1**) and the limited resistance to neutralization (1-to-1.2-fold) of clinical  
107 isolates was surprising. Two Lambda clinical isolates (**Figure 2b**, Lambda-S1 and -S2) with  
108 slightly different spike sequences were analyzed (**Supplementary Table S1**), and the results  
109 were consistent. The reporter SARS-CoV-2 system is powerful because the only difference

110 between the viruses being analyzed is the spike, whereas natural isolates have many differences  
111 throughout the genome and it's possible that changes in other gene products (e.g., membrane  
112 protein or envelope protein) could impact spike and/or neutralization phenotype but this remains  
113 to be understood.

114

115 Currently circulating variants are acquiring additional substitutions/deletions, which may further  
116 affect transmission, disease severity, or vaccine effectiveness and require prompt evaluation.  
117 Utilizing the short turnaround time of reverse genetics, we generated additional Alpha and Beta  
118 reporter viruses to examine the effects of specific substitutions that occurred in nature (**Figure**  
119 **2c**). While the 3 deletions and 7 substitutions in the Alpha variant spike protein (**Supplementary**  
120 **Table S1**) had a very small impact (1.3-fold) on neutralizing activity of vaccinee sera, we found  
121 the addition of the single E484K substitution in spike reduced the neutralizing titer of the Alpha  
122 variant by an additional 1.6-fold (2.1-fold compared to the 614D) (**Figure 2c**). The importance of  
123 spike-E484K is further demonstrated in a Beta reporter virus that encoded the spike-484 reversion  
124 (B.1.351+K484E), which was found to be 3-fold more susceptible to neutralization compared to  
125 an unmodified Beta variant B.1.351 (2.0-fold vs 6.1-fold) (**Figure 2c**). Interestingly, the N501Y  
126 substitution had little impact on the neutralization of the Beta variants (5.6-fold vs. 6.1-fold). A  
127 reporter virus containing substitutions only in the Beta variant receptor binding domain (RBD)  
128 (B.1.351-RBD, K417N+E484K+N501Y+D614G) was 1.7-fold more susceptible to neutralization  
129 compared to the Beta variant with full substitutions/deletions (i.e., 3.6-fold for B.1.351-RBD vs.  
130 6.1-fold for wild type Beta). This is an important observation, because it shows that the N-terminal  
131 domain (NTD) substitutions/deletions also contribute to virus neutralization or antibody escape  
132 (**Figure 2c**). Considering the plasticity of the SARS-CoV-2 spike to substitutions and deletions,  
133 as well as the recombination-prone nature of coronaviruses, substitutions and deletions present  
134 in current variants may also occur in future variants in different combinations or in different genetic  
135 backgrounds. Therefore, it is important to use reverse genetics or other focused approaches to  
136 assess the impact and understand the functionality of specific mutations in naturally occurring  
137 variants.

138

139 It is noteworthy that these findings demonstrate that the high levels of neutralizing antibodies  
140 elicited by mRNA vaccines neutralized most VOI/VOCs with less than 4-fold reduction in titers  
141 (**Figure 2 and Supplementary Table S2**) compared to the progenitor reference virus. The most  
142 prevalent variant globally, Delta, representing >99% of the SARS-CoV-2 viruses in the US as of  
143 October 23, 2021 (**Figure 1**), had only 1.7-to-2.4-fold reductions (**Figure 2a, 2b**). Although the

144 Beta, Theta, Kappa, and Mu variants had the largest fold-reductions ( $\geq 4$ -fold) relative to the  
145 reference virus, the abundance and prevalence of these variants in the US and globally decreased  
146 after the emergence and increase of the Delta variant. To better understand the effect of variant  
147 spikes on viral fitness, in the presence and absence of neutralizing antibodies, we compared the  
148 replication of reporter viruses with the variant spikes in Calu-3 cells, which are a human lung  
149 epithelial cell line (**Figure 2d**). In the absence of inhibitory sera, while Delta replicated to  
150 significantly higher titer than the original S-614D reference virus, its infectious titer was  
151 comparable to the S-614G virus and many other variants. Interestingly, in the presence of sera,  
152 even highly diluted, the titers of 614D and 614G viruses were reduced by more than 7-fold at 2x  
153 sera concentration ( $\text{FRNT}_{50} = 2$ ) and more than 300-fold at 5x sera concentration ( $\text{FRNT}_{50} = 5$ ).  
154 As anticipated from neutralization escape data (**Figure 2a**) the Beta variant replicated efficiently  
155 in the presence of both concentrations of sera (**Figure 2d**). Intriguingly, the Delta variant also  
156 replicated efficiently and only had a 3-fold reduction in titer at 5x sera concentration (**Figure 2d**).  
157 The Delta variant's ability to replicate efficiently in the presence of sub-neutralizing concentrations  
158 of antisera may have facilitated the infections of people with low-to-modest levels of neutralizing  
159 antibodies induced by prior infection or vaccination. The immune evasion of Delta variant may be  
160 an additive or synergistic result of spike mutations that reduce neutralizing activity and fitness  
161 advantages (e.g., faster cell entry) that are unrelated to neutralization but enhance replication and  
162 transmission.

163  
164 Notably, all tested sera neutralized these variants with  $\text{FRNT}_{50}$  titers higher than 10 and most of  
165 them higher than 40 (**Figure 2 and Supplementary Table S2**). It has been widely accepted in  
166 the influenza vaccine field that a neutralizing titer (hemagglutination inhibition titer) of 40 or higher  
167 is deemed protective ( $>50\%$  reduction of infection rate)<sup>12</sup> and a 4-to-8-fold reduction is deemed  
168 large enough to consider updating the influenza vaccine strain. For COVID-19 vaccines, a few  
169 studies on correlates of protection have been published<sup>13-15</sup>, but the minimum protective  
170 neutralizing titer and the fold reduction warranting a vaccine change have yet to be determined.  
171 This is also complicated by the unknown role of other effectors in vaccine protection such as  
172 memory B-cell or T cell immunity<sup>16</sup>. However, the level of neutralizing antibody titer is apparently  
173 predictive of the level of immune protection<sup>17,18</sup>. As neutralizing antibodies wane over time<sup>19</sup>,  
174 infections in fully vaccinated persons by variants circulating at high prevalence are likely to  
175 increase. Nevertheless, vaccines do prevent and attenuate COVID-19<sup>20</sup> and anamnestic  
176 responses provided through rapid expansion of memory cells should accelerate viral clearance.  
177 Therefore, closely monitoring the emergence of variants resistant to neutralization is a necessary

178 and urgent task, and vaccination remains the most effective strategy to combat the COVID-19  
179 pandemic.

180

181

## 182 **Acknowledgments:**

183 We thank César G Albariño, Dennis Bagarozzi, Jessica Chen, Jennifer Folster, Matthew Keller,  
184 Jimma Liddell, Ji Liu, Gillian McAllister, Magdalena Medrzycki, Krista Queen, Shannon Rogers,  
185 Jarad Schiffer, Maria Solano, Sarah Talarico, Brett Whitaker, Jiangwei Yao, and Natosha Zanders  
186 for coordination, testing, or analysis support. We acknowledge the hundreds of publications each  
187 containing neutralization results on some of the VOCs or VOIs reported in this manuscript for  
188 which we regret for not being able to cite due to the limitation on the number of references. This  
189 work was funded and supported by the CDC COVID-19 Emergency Response and part of the  
190 sequencing effort was made possible through support from the CDC Advanced Molecular  
191 Detection (AMD) program. Use of trade names is for identification only and does not imply  
192 endorsement by the US Centers for Disease Control and Prevention, the Agency for Toxic  
193 Substances and Disease Registry, the Public Health Service, or the US Department of Health  
194 and Human Services. The findings and conclusions in this report are those of the authors and do  
195 not necessarily represent the official position of the US Centers for Disease Control and  
196 Prevention.

197

## 198 **Methods:**

### 199 **Ethics statement**

200 Vaccinee serum samples were collected from individuals through the Influenza and Other Viruses  
201 in the Acutely Ill (IVY) Network, a Centers for Disease Control and Prevention (CDC)-funded  
202 collaboration to monitor the effectiveness of SARS-CoV-2 vaccines among US adults.  
203 Participants had no prior or current diagnosis of infection with SARS-CoV-2 and were fully  
204 vaccinated (at least 14 days after the second dose) with either Pfizer-BioNTech mRNA vaccine  
205 BNT162b2 or Moderna mRNA-1273 vaccine (Supplementary Table S2). This activity was  
206 approved by each participating institution, either as a research project with written informed  
207 consent or as a public health surveillance project without written informed consent. This activity  
208 was also reviewed by the CDC and conducted in a manner consistent with applicable federal laws  
209 and CDC policies: see e.g., 45 C.F.R. part 46.102(l)(2), 21 C.F.R. part 56; 42 U.S.C. §241(d); 5  
210 U.S.C. §552a; 44 U.S.C. §3501 et seq.

211



212 **Biosafety statement**

213 All work involving infectious SARS-CoV-2 virus, including recombinant reporter virus, was  
214 performed in CDC Biosafety Level 3 facilities with enhanced practices (BSL-3E). All personnel  
215 working with the virus were trained with relevant safety and procedure-specific protocols and their  
216 competency for performing the work in the BSL-3E laboratories was certified Recombinant DNA  
217 work was approved by CDC's Institutional Biosafety Committee (IBC). For sequencing, virus was  
218 inactivated following protocols approved by CDC's Laboratory Safety Review Board (LSRB) with  
219 a witness confirming that all steps were performed correctly to ensure complete inactivation of  
220 virus. After receiving appropriate approvals, inactivated virus was transferred to BSL-2E  
221 laboratories for downstream processing.

222

223 **Prevalence analysis of variants**

224 SARS-CoV-2 variant statistics for US specimens reported in the National SARS-CoV-2 Strain  
225 Surveillance (NS3) and CDC-contracted networks were extracted from a distributed data  
226 warehouse and rendered in Tableau Desktop (version 2021.1.1). Daily proportionalities were  
227 aggregated by attributed Pangolin (version 3.1.14) lineage assignment including variants of  
228 concern (VOC), variants of interest (VOI), and lineages with published World Health Organization  
229 (WHO) nomenclature<sup>5</sup>. Pangolin sub-lineages with shared WHO aliases were consolidated:  
230 B.1.1.7 and Q.1 – Q.8 (Alpha); B.1.351, B.1.351.2, and B.1.351.3 (Beta); P.1, P.1.1, and P.1.2  
231 (Gamma); B.1.617.2, AY.1 - AY.38 (Delta); and B.1.621 and B.1.621.1 (Mu). Unassigned variants  
232 and Pangolin lineages encoding an aspartate (D) or glycine (G) at position 614 were assigned  
233 respective "614D" and "614G" labels. Variants that did not satisfy the above criteria were  
234 consolidated into "Other Lineage(s)." Clinical statistics included all daily cases and deaths  
235 reported to the CDC surveillance network with marked consent. Applied data analytics excluded  
236 non-contracted US and global surveillance statistics to limit the impact of non-standardized  
237 reporting methodologies and regional over-sampling bias within our dataset.

238

239 **Generation of SARS-CoV-2 reporter viruses**

240 **Risk-benefit analysis.** A comprehensive risk-benefit analysis was conducted for using  
241 recombinant SARS-CoV-2 reporter viruses in neutralization assays. Briefly, the benefits of using  
242 the reporter viruses are: 1) enabling rapid characterization of variants before they are detected in  
243 the United States or before CDC receives specimens; 2) eliminating all fixation and staining steps  
244 in neutralization assays, shortening the time infectious samples are handled, and reducing  
245 chemical safety risks (e.g., formalin) by removing the need to fix cells; 3) minimizing the impact



246 of substitutions in non-spike genes on neutralizing titers, as changes solely reflect the effect of  
247 spike mutations; 4) enabling assessment of impact of individual or specific sets of spike mutations;  
248 5) enabling more consistent comparisons as isolates from different clinical specimens were noted  
249 to have distinct growth properties even though they were from the same lineage. The associated  
250 risk assessments are: 1) reporter viruses are different from any natural virus and created by  
251 introducing the spike mutations from a new variant into the backbone virus (progenitor strain  
252 Wuhan-Hu-1). The transmissibility of a particular resultant virus could be somewhere between the  
253 progenitor virus and the natural variant; 2) as there is limited epidemiological or clinical evidence  
254 to suggest spike mutations present in SARS-CoV-2 variants increase pathogenicity, it is most  
255 likely the pathogenicity of the reporter viruses will be equivalent or reduced as compared to the  
256 progenitor strain or the variant strain; 3) all naturally occurring SARS-CoV-2 variants descending  
257 from the progenitor strain have acquired mutations in other genes along with the spike gene. It is  
258 possible that some of the non-spike mutations may decrease the transmissibility or pathogenicity  
259 of the variant, in which case a reporter virus may be more transmissible or pathogenic than the  
260 variant. However, sequence analysis and literature review indicate this risk is very low, especially  
261 regarding its potential public health impact during this ongoing pandemic. The safeguard and  
262 mitigation strategies are: 1) the backbone of the reporter virus are based on the Wuhan-Hu-1  
263 strain, which is expected to be the least transmissible strain compared to later variants; 2) a  
264 mNeonGreen reporter gene replaces the ORF7a in the reporter virus, which may attenuate the  
265 virus as the ORF7a protein has been reported to be an interferon antagonist<sup>21,22</sup>; 3) mutations  
266 engineered into a reporter virus are either part of or all of the spike mutations found in a natural  
267 isolate and the engineering of unnatural mutations is prohibited; 4) the reporter viruses are only  
268 to be used in *in vitro* studies, such as neutralization assays, and not in *in vivo* studies; 5) all the  
269 *in vitro* work is conducted in BSL-3E facilities including enhanced practices such as shower out  
270 after experiments to minimize the possibility of accidental release of the reporter virus to the  
271 environment; 6) all staff working with the reporter viruses are fully vaccinated; 7) all staff are  
272 approved for working with BSL-3E select agents with senior staff having decades of BSL-3E  
273 experience working with highly pathogenic viruses. The **conclusion** is: under the current public  
274 health emergency, with the urgency for antigenic surveillance of variants, the benefits of using  
275 SARS-CoV-2 reporter viruses exceeds the risks associated with generating and using  
276 recombinant reporter viruses. These risks are believed to be extremely low after mitigation.

277

278 **DNA construct.** The DNA clone for SARS-CoV-2 strain Wuhan-Hu-1 (GenBank accession  
279 number: NC\_045512) was purchased from Codex DNA (San Diego, CA). The viral genome was

280 flanked by a T7 promoter sequence at the 5' end and a linearization site at the 3' end. The whole  
281 cassette was cloned into a bacterial artificial chromosome (BAC) vector. The DNA clone was  
282 modified to replace the ORF7a gene with a human codon-optimized mNeonGreen gene  
283 (GenBank accession number: AGG56535.1) following the design reported previously<sup>23</sup>. The  
284 spike gene of this progenitor reporter virus was excised by *Ascl* and *BamHI*-HF restriction  
285 enzymes, resulting in a linearized vector into which synthetic variant spike genes can be  
286 assembled using Gibson Assembly (NEB). The Gibson Assembly reaction was then transformed  
287 into TransforMax™ EPI300™ Electrocompetent *E. coli* (Lucigen). Transformations were  
288 immediately recovered in SOC medium at 30°C for 1 hour, and plated on LB agar plates  
289 containing 25 µg/ml chloramphenicol, followed by approximately 2 days of incubation at 30°C.  
290 Colonies were picked and inoculated into LB broth containing 25 µg/ml chloramphenicol for  
291 approximately 16±2 hours followed by induction for approximately 4±1 hours at 30°C. DNA was  
292 extracted and the sequence was verified by Illumina next-generation sequencing (NGS).

293

294 ***In vitro* transcription.** Infectious clones were linearized by *SbfI*-HF digestion and cleaned up by  
295 phenol:chloroform:isoamyl alcohol (PCIA) (25:24:1) extraction. Full-length viral RNA was  
296 generated using the T7 RiboMAX™ Express Large Scale RNA Production System with slight  
297 modifications to manufacturer's instructions (Promega). Briefly, reaction components were  
298 adjusted such that in a 50 µL reaction the final concentration of ATP, CTP, and UTP was 7.5 mM,  
299 GTP was 3.5 mM, and the Anti-Reverse Cap Analog (NEB) was used at 2.8 mM. After 2-3 hours  
300 of incubation at 30°C, RNA was cleaned up by PCIA and ethanol precipitated for at least 1 hour.  
301 Quality of the RNA was assessed by UV-vis spectroscopy and denaturing agarose gel  
302 electrophoresis.

303

304 **Nucleocapsid protein expressing cell line.** Vero E6 cells (ATCC, CRL-1586) were transfected  
305 using Lipofectamine 3000 (Invitrogen) with a plasmid encoding SARS-CoV-2 nucleocapsid  
306 protein via CMV3 promoter as well as mCherry2 via an IRES element. Transfected cells were  
307 placed under drug selection (0.1-0.3 mg/ml geneticin) to establish the pooled bulk population.  
308 Stable single-cell clones were selected from the bulk population by serial dilution plating and drug  
309 selection. The expression of nucleocapsid protein was confirmed by the SARS-CoV-2  
310 Nucleocapsid Protein ELISA Kit (ABclonal, Woburn, MA) and the cell clone supporting the most  
311 efficient virus rescue was selected (VeroE6-N). Cells were maintained in DMEM supplemented  
312 with 10% FBS and 0.2 mg/ml geneticin.

313

314 **Virus rescue.** To rescue the SARS-CoV-2 reporter virus, VeroE6-N cells were trypsinized,  
315 washed with Opti-MEM (ThermoFisher) and resuspended in 100  $\mu$ L nucleofector solution at a  
316 concentration of  $1.5 \times 10^6$  cells/100  $\mu$ l following the instructions of the Nucleofector Kit V (Lonza).  
317 *In vitro* transcribed RNA (5  $\mu$ g) was added to the cells and the cell-RNA mixture was transferred  
318 into an electroporation cuvette. Electroporation was completed using the Program T-024 of the  
319 Nucleofector 2b device (Lonza). Electroporated cells were immediately transferred into a 6-well  
320 plate pre-filled with 2 ml/well of pre-warmed Opti-MEM. At 18-24 hours post-transfection,  
321 supernatant was collected (P0) and inoculated onto a monolayer of VeroE6/TMPRSS2 cells<sup>24</sup>  
322 (JCRB1819, JCRB Cell Bank). Twenty-four hours post-inoculation, supernatant was collected to  
323 make the seed stock (P1). P1 was propagated in T-150 flasks of VeroE6/TMPRSS2 cells at a  
324 multiplicity of infection (MOI) of 0.02-0.1 for 24 hours to make the P2 working stock. The working  
325 stock was sequenced as described below.

326  
327 **Sequence confirmation.** All the SARS-CoV-2 reporter viruses were sequenced by NGS to  
328 confirm the sequence of the spike gene. Total RNA was extracted from the working stock of each  
329 reporter virus and treated with DNase using the DNase Max kit (Qiagen) following manufacturer's  
330 instructions. Five microliters of resulting clean RNA was used for first- and second-strand cDNA  
331 synthesis and library preparation using NEB Ultra II Directional RNA library prep kit for Illumina  
332 (New England Biolabs, Ipswich, MA, USA). Libraries were barcoded with unique dual indices  
333 synthesized in the CDC Biotechnology Core Facility Oligonucleotide Synthesis Laboratory.  
334 Resulting libraries were analyzed for size using the Agilent Fragment Analyzer (Agilent  
335 Technologies, Inc., Santa Clara, CA) and quantified using the Qubit 4 Fluorometer (Thermo  
336 Fischer Scientific, Waltham, MA). Libraries were normalized to equimolar concentrations, pooled,  
337 and sequenced on Illumina NovaSeq 6000 (Illumina, San Diego, CA, USA) using the NovaSeq  
338 v1.5 SP Reagent Kit (300 cycles). Demultiplexed reads were processed and assembled using the  
339 Iterative Refinement Meta-Assembler (IRMA) on a custom CoV-recombinant configuration<sup>25</sup>. The  
340 614D reporter virus (Wuhan-Hu-1 strain with the ORF7a gene replaced by mNeonGreen) was  
341 used as the reference. Reads were filtered for a minimum median phred score (Q score) of 27  
342 and a minimum read length of 80 bases. A Striped Smith-Waterman algorithm was selected for  
343 read alignment, and final assembly was performed against the reference sequence matched  
344 during read gathering. Amended consensus genomes were created from plurality  
345 assemblies by ambiguation of bases with coverage  $< 20\times$  to 'N', and positions with a minor allele  
346 frequency (MAF)  $> 0.2$  were given ambiguous nucleotide codes according to IUPAC conventions.  
347 Quality metrics were calculated using a count of non-ambiguated amended consensus bases to

348 show proportion of recombinant genome assembled, and average coverage depth across the  
349 genome was noted. The full genome sequences of all the viruses are being deposited in GenBank  
350 and accession numbers will be provided.

351

### 352 **MSD binding assays**

353 Serum samples were analyzed at 1:100 and 1:5000 dilutions for IgG, IgM, and IgA to SARS-  
354 CoV-2 nucleocapsid (N), SARS-CoV-2 S1 receptor binding domain (RBD), and SARS-CoV-2  
355 spike (S) protein (V-PLEX SARS-CoV-2 Panel 2 Kit, Meso Scale Discovery, Rockville, MD), as  
356 described previously<sup>26</sup>. Serum antibody levels were calculated using Reference Standard 1 and  
357 converted to WHO International Binding Antibody Units (BAU/mL) per manufacturer kit  
358 instructions.

359

### 360 **Focus Reduction Neutralization Test (FRNT)**

361 **Reporter virus-based assay.** Serum specimens were heat-inactivated at 56°C for 30 minutes,  
362 aliquoted, and stored at -80°C. Each serum sample was serially diluted in 3-fold steps (1:40–  
363 1:29,160) in sextuplicate in 96-well round bottom plates. SARS-CoV-2 reporter virus was diluted  
364 to 3,200-4,000 focus forming units (FFUs) per ml. Diluted serum samples were mixed with an  
365 equal volume of diluted virus and incubated for 1 hour at room temperature (21±2°C). Media from  
366 confluent monolayer VeroE6/TMPRSS2 in 96-well tissue culture plates was removed, and 50 µl  
367 of the serum–virus mixture was inoculated into each well of cells and incubated at 37°C in a 5%  
368 CO<sub>2</sub> atmosphere for 2 hours. The wells were overlaid with 100 µl of 0.75% methylcellulose in  
369 DMEM (Gibco), supplemented with 2% HI-FBS and 1x Pen-Strep and incubated at 33°C in a 5%  
370 CO<sub>2</sub> incubator for 16-18 hours. Plates were scanned using a CellInsight CX5 High-Content  
371 Screening Platform (Thermo Scientific) running an ‘Acquisition Only’ protocol within Cellomics  
372 Scan Version 6.6.0 (Thermo Scientific, Build 8153). All plates were imaged under equal exposure  
373 conditions per channel and under 4x magnification.

374 Foci were identified and quantified using appropriate ‘Spot Detection’ protocol within Cellomics  
375 Scan Version 6.6.2 (Thermo Scientific, Build 8533). Spot counts for each channel were exported  
376 for further analysis in R (Version 4.0.3). FRNT<sub>50</sub> values were calculated by fitting the three-  
377 parameter log-logistic function (LL.3) to the FFU counts paired with corresponding dilution  
378 information. In cases where the Hill Constant was fit at less than 0.5, e.g., incomplete  
379 neutralization, FRNT<sub>50</sub> values were estimated with a two-parameter fit while fixing the Hill  
380 Constant to 1. The R script has been deposited in GitHub: [https://github.com/CDCgov/SARS-](https://github.com/CDCgov/SARS-CoV-2_FRNTcalculations/)  
381 [CoV-2\\_FRNTcalculations/](https://github.com/CDCgov/SARS-CoV-2_FRNTcalculations/).

382

383 **Clinical isolate-based assay.** SARS-CoV-2 isolates were propagated on Vero/TMPRSS2 cells.  
384 All stocks were inoculated at multiplicity of infection (MOI) of approximately 0.004 and harvested  
385 at 2 days post-inoculation. The viral spike sequences were verified using unbiased NGS  
386 sequencing (KAPA HyperPrep library kit with RiboErase, followed by Illumina sequencing). All  
387 cells and virus stocks tested negative for mycoplasma using MycoAlert Plus reagents (Lonza).  
388 Heat-inactivated serum samples were serially diluted in 3-fold steps in DMEM supplemented with  
389 2% heat-inactivated fetal bovine serum (HI-FBS), 1x Pen-Strep and sodium pyruvate (Gibco). The  
390 serum dilutions were mixed with an equal volume of virus in the same medium (final serum  
391 dilutions 1:10-1:7,290) and incubated for 1 hour at 37°C. Vero/TMPRSS2 cells growing in 96-well  
392 imaging plates were then inoculated in triplicate with 40 µL of serum-virus mixtures and incubated  
393 for 1 hour at 37°C with periodic shaking of the plates. Inocula were removed and cells overlaid  
394 with 1.5% medium viscosity carboxymethylcellulose (Sigma-Aldrich) in MEM (Gibco),  
395 supplemented with 4% HI-FBS, 1x Penicillin-Streptomycin (pen/strep), and sodium pyruvate.  
396 Twenty hours later, the overlay was washed off with PBS, and cells fixed with 10% neutral-  
397 buffered formalin, permeabilized with 0.5% Triton X100 in PBS, blocked with 1% bovine serum  
398 albumin in PBS, and stained using SARS/SARS-CoV-2 Coronavirus Nucleocapsid Monoclonal  
399 Antibody (Invitrogen MA5-29981) as the primary antibody followed by Alexa647-conjugated  
400 secondary antibody (Invitrogen). The monolayers were imaged using a BioTek Cytation3  
401 instrument and virus foci (approximately 100-200/well in no-serum control wells) were counted  
402 using Gen5 software. The foci counts were normalized to no-serum controls, and 4 parameter  
403 nonlinear regression analysis with bottom constraint set to 0, and top value set to 1 (GraphPad  
404 Prism v7.04) was used to fit a curve to the data and to determine the FRNT<sub>50</sub> value.

405

406 **Data processing and statistical analysis.** Geometric mean titers (GMTs) of each virus were  
407 calculated using the FRNT<sub>50</sub> neutralizing titers of all the serum samples tested against that virus.  
408 Average fold change of a variant against the 614D virus (Wuhan-Hu-1 or WA-1) was calculated  
409 as the arithmetic mean of the corresponding FRNT<sub>50</sub> ratios (614D/variant) of each serum sample.  
410 SARS-CoV-2 variants isolated from clinical specimens were tested upon availability in parallel  
411 with WA-1. All serum/variant combinations were tested twice in independent experiments. In  
412 Figure 2B, the arithmetic mean WA-1 FRNT<sub>50</sub> value for each serum is presented (2-8 independent  
413 runs). For other variants, the FRNT<sub>50</sub> fold-differences to WA-1 were determined from two  
414 independent runs per serum sample, and the FRNT<sub>50</sub> value resulting from this fold average and  
415 the grand average FRNT<sub>50</sub> for WA-1 are depicted. For statistical analysis, normality test and

416 residual diagnostics were performed on the data as the assumption of normality was violated, the  
417 data were analyzed using a nonparametric test in the SAS NPAR1WAY procedure. The Dwass,  
418 Steel, Critchlow-Fligner method<sup>27-29</sup> was used for multiple comparisons. Statistical analyses were  
419 performed using SAS 9.2 (SAS Institute), with p-value < 0.05 considered significant.

420

#### 421 **Virus replication in Calu-3 cells.**

422 Calu-3 cells (Human lung epithelial cell line) were obtained from CDC's Division of Scientific  
423 Resources (DSR). Cells were seeded in 12-well plates and cultured 4 to 5 days until cell  
424 confluence reached 80-90% before infection. Culture media was removed from the cells before  
425 infection and 200-400 focus forming unit (FFU) virus was added into each well (triplicate wells  
426 for each virus). The plates were incubated at 37°C in a 5% CO<sub>2</sub> atmosphere for 1 hour. Ten  
427 individual vaccinee serum samples from persons received Pfizer-BioNTech mRNA vaccine  
428 BNT162b2 and 10 vaccinee serum samples from persons received Moderna mRNA-1273 vaccine  
429 were each normalized to 500 FRNT50 (against 614D reference virus) and pooled separately  
430 (500X stock). Pooled Moderna or Pfizer sera was diluted to 2X or 5X concentration (FRNT50=2  
431 or 5 against 614D reference virus) in infection media (DMEM supplemented with 2% HI-FBS and  
432 1x pen/strep). The inoculum was removed from each well after incubation and 1ml of infection  
433 media with or without the diluted sera was added to corresponding wells (0X, 2X, or 5X FRNT50)  
434 and the plates were returned to the 37°C, 5% CO<sub>2</sub> incubator for further incubation. Two days  
435 later, the culture supernatant was collected and titrated by FFU assay. The FFU assay was  
436 performed similarly to the FRNT assay by serial dilution of the virus and without mixing the virus  
437 with any sera. The foci acquisition and quantification steps were same as described in the FRNT  
438 assay. For each variant, the viral titers in the presence of sera were compared to those in the  
439 absence of sera to calculate the fold of change (reduction) in titers. The significance of the  
440 reduction was analyzed by one-way ANOVA with Dunnett's multiple comparisons test (no sera  
441 vs. 2X sera; no sera vs. 5X sera).

442



443 **References:**

- 444 1 Hou, Y. J. *et al.* SARS-CoV-2 D614G variant exhibits efficient replication ex vivo and  
445 transmission in vivo. *Science* **370**, 1464-1468, doi:10.1126/science.abe8499 (2020).
- 446 2 Plante, J. A. *et al.* Spike mutation D614G alters SARS-CoV-2 fitness. *Nature* **592**, 116-  
447 121, doi:10.1038/s41586-020-2895-3 (2021).
- 448 3 Zhou, B. *et al.* SARS-CoV-2 spike D614G change enhances replication and transmission.  
449 *Nature* **592**, 122-127, doi:10.1038/s41586-021-03361-1 (2021).
- 450 4 Public Health England. Investigation of novel SARS-CoV-2 variant: variant of concern  
451 202012/01, technical briefing 3. London, United Kingdom: Public Health England,  
452 doi:[https://assets.publishing.service.gov.uk/government/uploads/system/uploads/attach  
453 ment\\_data/file/950823/Variant\\_of\\_Concern\\_VOC\\_202012\\_01\\_Technical\\_Briefing\\_3 -  
454 \\_England.pdf](https://assets.publishing.service.gov.uk/government/uploads/system/uploads/attachment_data/file/950823/Variant_of_Concern_VOC_202012_01_Technical_Briefing_3_-_England.pdf) (2020).
- 455 5 Konings, F. *et al.* SARS-CoV-2 Variants of Interest and Concern naming scheme  
456 conducive for global discourse. *Nature Microbiology* **6**, 821-823, doi:10.1038/s41564-021-  
457 00932-w (2021).
- 458 6 Galloway, S. E. *et al.* Emergence of SARS-CoV-2 B.1.1.7 Lineage - United States,  
459 December 29, 2020-January 12, 2021. *MMWR Morb Mortal Wkly Rep* **70**, 95-99,  
460 doi:10.15585/mmwr.mm7003e2 (2021).
- 461 7 Paul, P. *et al.* Genomic Surveillance for SARS-CoV-2 Variants Circulating in the United  
462 States, December 2020-May 2021. *MMWR Morb Mortal Wkly Rep* **70**, 846-850,  
463 doi:10.15585/mmwr.mm7023a3 (2021).
- 464 8 Tegally, H. *et al.* Detection of a SARS-CoV-2 variant of concern in South Africa. *Nature*  
465 **592**, 438-443, doi:10.1038/s41586-021-03402-9 (2021).
- 466 9 Castro, M. C. *et al.* Spatiotemporal pattern of COVID-19 spread in Brazil. *Science* **372**,  
467 821-826, doi:10.1126/science.abh1558 (2021).
- 468 10 Naveca, F. G. *et al.* COVID-19 in Amazonas, Brazil, was driven by the persistence of  
469 endemic lineages and P.1 emergence. *Nature Medicine* **27**, 1230-1238,  
470 doi:10.1038/s41591-021-01378-7 (2021).
- 471 11 Cherian, S. *et al.* Convergent evolution of SARS-CoV-2 spike mutations, L452R, E484Q  
472 and P681R, in the second wave of COVID-19 in Maharashtra, India. *bioRxiv*,  
473 2021.2004.2022.440932, doi:10.1101/2021.04.22.440932 (2021).
- 474 12 Hannoun, C., Megas, F. & Piercy, J. Immunogenicity and protective efficacy of influenza  
475 vaccination. *Virus Res* **103**, 133-138, doi:10.1016/j.virusres.2004.02.025 (2004).
- 476 13 Feng, S. *et al.* Correlates of protection against symptomatic and asymptomatic SARS-  
477 CoV-2 infection. *medRxiv*, 2021.2006.2021.21258528,  
478 doi:10.1101/2021.06.21.21258528 (2021).
- 479 14 McMahan, K. *et al.* Correlates of protection against SARS-CoV-2 in rhesus macaques.  
480 *Nature* **590**, 630-634, doi:10.1038/s41586-020-03041-6 (2021).
- 481 15 Corbett, K. S. *et al.* Immune Correlates of Protection by mRNA-1273 Immunization against  
482 SARS-CoV-2 Infection in Nonhuman Primates. *bioRxiv : the preprint server for biology*,  
483 2021.2004.2020.440647, doi:10.1101/2021.04.20.440647 (2021).
- 484 16 Sette, A. & Crotty, S. Adaptive immunity to SARS-CoV-2 and COVID-19. *Cell* **184**, 861-  
485 880, doi:10.1016/j.cell.2021.01.007 (2021).
- 486 17 Houry, D. S. *et al.* Neutralizing antibody levels are highly predictive of immune protection  
487 from symptomatic SARS-CoV-2 infection. *Nature Medicine* **27**, 1205-1211,  
488 doi:10.1038/s41591-021-01377-8 (2021).
- 489 18 Earle, K. A. *et al.* Evidence for antibody as a protective correlate for COVID-19 vaccines.  
490 *Vaccine* **39**, 4423-4428, doi:<https://doi.org/10.1016/j.vaccine.2021.05.063> (2021).
- 491 19 Pegu, A. *et al.* Durability of mRNA-1273-induced antibodies against SARS-CoV-2  
492 variants. *bioRxiv*, doi:10.1101/2021.05.13.444010 (2021).



- 493 20 Thompson, M. G. *et al.* Prevention and Attenuation of Covid-19 with the BNT162b2 and  
494 mRNA-1273 Vaccines. *New England Journal of Medicine* **385**, 320-329,  
495 doi:10.1056/NEJMoa2107058 (2021).
- 496 21 Cao, Z. *et al.* Ubiquitination of SARS-CoV-2 ORF7a promotes antagonism of interferon  
497 response. *Cell Mol Immunol* **18**, 746-748, doi:10.1038/s41423-020-00603-6 (2021).
- 498 22 Nemudryi, A. *et al.* SARS-CoV-2 genomic surveillance identifies naturally occurring  
499 truncation of ORF7a that limits immune suppression. *Cell Rep* **35**, 109197,  
500 doi:10.1016/j.celrep.2021.109197 (2021).
- 501 23 Xie, X. *et al.* An Infectious cDNA Clone of SARS-CoV-2. *Cell Host Microbe* **27**, 841-  
502 848.e843, doi:10.1016/j.chom.2020.04.004 (2020).
- 503 24 Matsuyama, S. *et al.* Enhanced isolation of SARS-CoV-2 by TMPRSS2-expressing cells.  
504 *Proc Natl Acad Sci U S A* **117**, 7001-7003, doi:10.1073/pnas.2002589117 (2020).
- 505 25 Shepard, S. S. *et al.* Viral deep sequencing needs an adaptive approach: IRMA, the  
506 iterative refinement meta-assembler. *BMC Genomics* **17**, 708, doi:10.1186/s12864-016-  
507 3030-6 (2016).
- 508 26 Edara, V. V. *et al.* Infection- and vaccine-induced antibody binding and neutralization of  
509 the B.1.351 SARS-CoV-2 variant. *Cell Host Microbe* **29**, 516-521.e513,  
510 doi:10.1016/j.chom.2021.03.009 (2021).
- 511 27 Dwass, M. in *Contributions to Probability and Statistics* (ed I. Olkin) 198-202 (Stanford  
512 University Press, 1960).
- 513 28 Steel, R. G. D. A Rank Sum Test for Comparing All Pairs of Treatments. *Technometrics*  
514 **2**, 197-207, doi:10.2307/1266545 (1960).
- 515 29 Douglas, C. E. & Michael, F. A. On distribution-free multiple comparisons in the one-way  
516 analysis of variance. *Communications in Statistics - Theory and Methods* **20**, 127-139,  
517 doi:10.1080/03610929108830487 (1991).

518

519 **Figure Legends:**

520 **Figure 1. Prevalence of SARS-CoV-2 variants in the United States.** SARS-CoV-2 variant  
521 prevalence is shown for clinical specimens processed within the National SARS-CoV-2 Strain  
522 Surveillance (NS3) and CDC-contracted networks by relative, daily incidence (dot icons) for key  
523 Pangolin lineages (WHO nomenclature in parentheses), VOIs/VOCs, and specimens encoding  
524 critical sequence markers (614D/G) but not belonging to those variants. Daily reported clinical  
525 cases are summarized in the bar graph (right-side, Y-axis).

526

527 **Figure 2. Neutralization and inhibition of mRNA vaccinee sera against live SARS-CoV-2**  
528 **viruses.** Each dot represents the neutralizing titer (FRNT<sub>50</sub>) of an individual serum sample; at  
529 least 20 sera were tested against each variant. The average fold changes relative to reference  
530 virus 614D (set as 1-fold) are shown on the top of the graph. For each variant, the average fold  
531 change is the arithmetic mean of the individual FRNT<sub>50</sub> ratios (614D/variant) calculated for each  
532 serum sample. Dashed line represents the limit of quantitation (LOQ). **(a)** All WHO and US-CDC  
533 designated SARS-CoV-2 variants of concern (VOCs) and variants of interest (VOIs) were tested  
534 using reporter viruses. The geometric mean FRNT<sub>50</sub> titers are shown on the graph with standard  
535 deviation. The average fold changes of all variants differ significantly ( $P < 0.0001$ ) from 614D,  
536 except for 614G ( $P = 0.9999$ ). **(b)** VOCs and selected VOIs isolated from clinical specimens were  
537 tested. The average fold change of all variants differs significantly ( $P < 0.001$ ) from 614D, except  
538 for B.1.1.7 ( $P = 0.9995$ ) and the two C.37 viruses (C.37( $\lambda$ ) S1 and S2). **(c)** Reporter viruses with or  
539 without specific substitutions were tested to illustrate the impact of specific substitutions. B.1.351  
540 + Y501N has the reversion to original N at 501 of S, and B.1.351 + K484E has a reversion to  
541 original E at 484 of S. B.1.351-RBD contains the K417N, E484K, N501Y substitutions in RBD  
542 along with the downstream D614G substitution. Thin gray lines link the same serum sample tested  
543 against the different viruses. The thick black line links the geometric mean titers of different  
544 variants. **(d)** Calu-3 cells were infected with 200-400 focus forming unit (FFU) of each virus and  
545 incubated for 2 days in media with or without sera. The sera were pooled from the individual sera  
546 used in (a) and diluted to 2X or 5X concentration (diluted sera titer FRNT<sub>50</sub> = 2 or 5 against 614D  
547 reference virus). The viruses were collected from Calu-3 supernatant at 2 days post inoculation  
548 and titrated by FFU assay. Titer differences are marked as \*, representing  $p < 0.05$  (ANOVA) for  
549 statistical significance, compared to the no sera control within each variant group. Fold changes  
550 (reductions) compared to the no sera control are shown on the top of the panel.

551

552 **Supplementary Table S1. List of sequence-confirmed substitutions and deletions present**  
553 **in the spike protein of the viruses used in this study.**

554

555 **Supplementary Table S2. Quantification of nucleocapsid, spike and RBD binding antibody**  
556 **units as well as neutralizing antibody titers against 614D and Delta variant (B.1.617.2).**

557

Figure 1

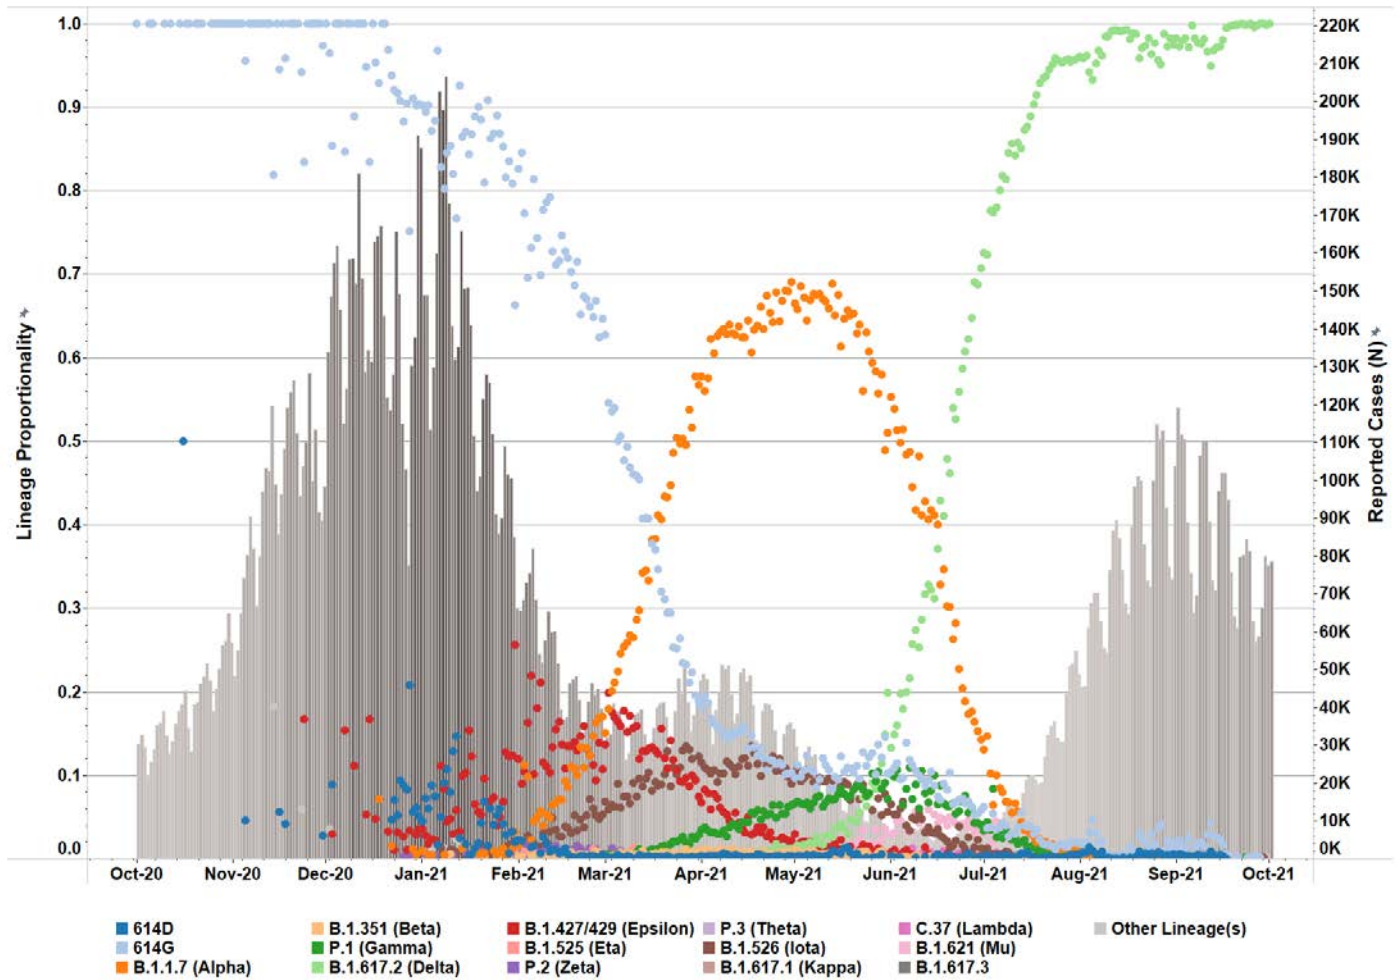

**Figure 1. Prevalence of SARS-CoV-2 variants in the United States.** SARS-CoV-2 variant prevalence is highlighted for clinical specimens processed within US National SARS-CoV-2 Strain Surveillance networks by relative, daily incidence (dot icons, 0.0 to 1.0) for key Pangolin lineages (WHO nomenclature in parentheses), VOI/VOCs, and specimens encoding critical sequence markers (614D/G) but do not belong to those variants. Daily, reported clinical cases are summarized in the bar graph (right-side, dual Y-axis).

**Figure 2**

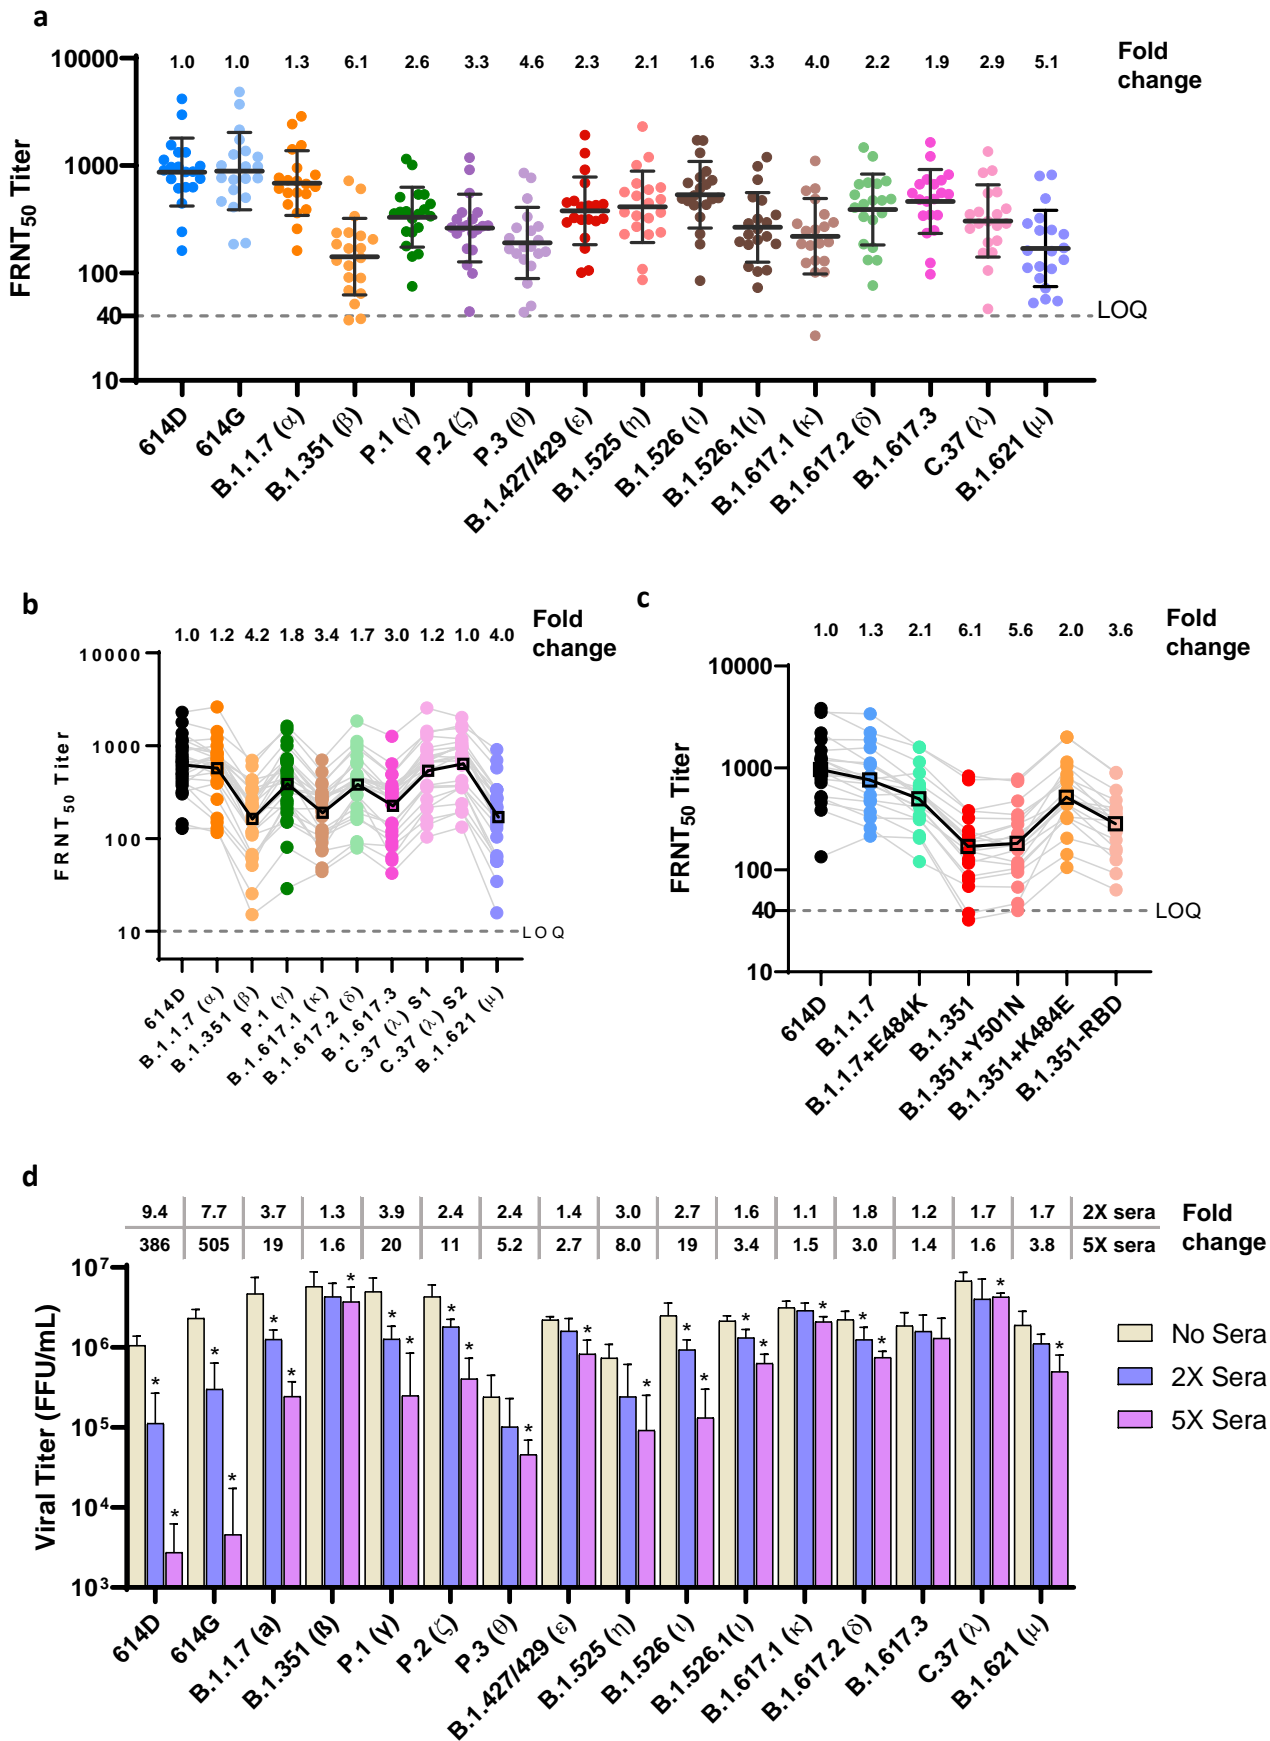

**Figure 2. Neutralization and inhibition of mRNA vaccinee sera against live SARS-CoV-2 viruses.** Each dot represents the neutralizing titer (FRNT<sub>50</sub>) of an individual serum sample; at least 20 sera were tested against each variant. The average fold changes relative to reference virus 614D (set as 1-fold) are shown on the top of the graph. For each variant, the average fold change is the arithmetic mean of the individual FRNT<sub>50</sub> ratios (614D/variant) calculated for each serum sample. Dashed line represents the limit of quantitation (LOQ). **(a)** All WHO and US-CDC designated SARS-CoV-2 variants of concern (VOCs) and variants of interest (VOIs) were tested using reporter viruses. The geometric mean FRNT<sub>50</sub> titers are shown on the graph with standard deviation. The average fold changes of all variants differ significantly ( $P < 0.0001$ ) from 614D, except for 614G ( $P = 0.9999$ ). **(b)** VOCs and selected VOIs isolated from clinical specimens were tested. The average fold change of all variants differs significantly ( $P < 0.001$ ) from 614D, except for B.1.1.7 ( $P = 0.9995$ ) and the two C.37 viruses (C.37(λ) S1 and S2). **(c)** Reporter viruses with or without specific substitutions were tested to illustrate the impact of specific substitutions. B.1.351 + Y501N has the reversion to original N at 501 of S, and B.1.351 + K484E has a reversion to original E at 484 of S. B.1.351-RBD contains the K417N, E484K, N501Y substitutions in RBD along with the downstream D614G substitution. Thin gray lines link the same serum sample tested against the different viruses. The thick black line links the geometric mean titers of different variants. **(d)** Calu-3 cells were infected with 200-400 focus forming unit (FFU) of each virus and incubated for 2 days in media with or without sera. The sera were pooled from the individual sera used in (a) and diluted to 2X or 5X concentration (diluted sera titer FRNT<sub>50</sub> = 2 or 5 against 614D reference virus). The viruses were collected from Calu-3 supernatant at 2 days post inoculation and titrated by FFU assay. Titer differences are marked as \*, representing  $p < 0.05$  (Student's t-test) for statistical significance, compared to the no sera control within each virus group. Fold changes (reductions) compared to the no sera control are shown on the top of the panel.
